# Supplementary material
Source: publisher figshare collection journal article supplement (https://sage.figshare.com/ndownloader/files/12541892)
Supplement: Supplementary file 1 [file 12541892]

**Supplemental Figure 1:** Mean sound pressure levels after conversion to free-field equivalents for every volume level on the PLD used for objective assessment of listening preferences (Iphone 5®, Apple Inc.).
